# Supplementary material
Source: PubMed Central journal article supplement (PMC2634952)
Supplement: 0810826105_0810826105SI.pdf [file 0810826105_0810826105SI.pdf]

# Supporting Information

Davidovich *et al.* 10.1073/pnas.0810826105

## SI Text

1. Douthwaite S (1992) Functional interactions within 23S rRNA involving the peptidyl-transferase center. *J Bacteriol* 174:1333–1338.
2. Pringle M, Poehlsgaard J, Vester B, Long KS (2004) Mutations in ribosomal protein L3 and 23S ribosomal RNA at the peptidyl transferase centre are associated with reduced susceptibility to tiamulin in *Brachyspira* spp. isolates. *Mol Microbiol* 54:1295–1306.
3. Xiong L, *et al.* (2000) Oxazolidinone resistance mutations in 23S rRNA of *Escherichia coli* reveal the central region of domain V as the primary site of drug action. *J Bacteriol* 182:5325–5331.
4. Ettayebi M, Prasad SM, Morgan EA (1985) Chloramphenicol-erythromycin resistance mutations in a 23S rRNA gene of *Escherichia coli*. *J Bacteriol* 162:551–557.
5. Porse BT, Garrett RA (1999) Sites of interaction of streptogramin A and B antibiotics in the peptidyl transferase loop of 23 S rRNA and the synergism of their inhibitory mechanisms. *J Mol Biol* 286:375–387.
6. Mankin AS, Garrett RA (1991) Chloramphenicol resistance mutations in the single 23S rRNA gene of the archaeon *H. halobium*. *J Bacteriol* 173:3559–3563.
7. Kloss P, Xiong L, Shinabarger DL, Mankin AS (1999) Resistance mutations in 23 S rRNA identify the site of action of the protein synthesis inhibitor linezolid in the ribosomal peptidyl transferase center. *J Mol Biol* 294:93–101.
8. Depardieu F, Courvalin P (2001) Mutation in 23S rRNA responsible for resistance to 16-membered macrolides and streptogramins in *Streptococcus pneumoniae*. *Antimicrob Agents Chemother* 45(1):319–323.
9. Sander P, *et al.* (2002) Ribosomal and non-ribosomal resistance to oxazolidinones: Species-specific idiosyncrasy of ribosomal alterations. *Mol Microbiol* 46:1295–1304.
10. Miller K, Dunsmore CJ, Fishwick CW, Chopra I (2008) Linezolid and tiamulin cross-resistance in *Staphylococcus aureus* mediated by point mutations in the peptidyl transferase center. *Antimicrob Agents Chemother* 52:1737–1742.
11. Thompson J, *et al.* (2001) Analysis of mutations at residues A2451 and G2447 of 23S rRNA in the peptidyltransferase active site of the 50S ribosomal subunit. *Proc Natl Acad Sci USA* 98:9002–9007.
12. Meka VG, *et al.* (2004). Linezolid resistance in sequential *Staphylococcus aureus* isolates associated with a T2500A mutation in the 23SrRNA gene and loss of a single copy of rRNA. *J Infect Dis* 190:311–317.
13. Vester B, Garrett RA (1988) The importance of highly conserved nucleotides in the binding region of chloramphenicol at the peptidyl transfer centre of *Escherichia coli* 23S ribosomal RNA. *EMBO J* 7(11):3577–3587.
14. Long KS, Poehlsgaard J, Kehrenberg C, Schwarz S, Vester B (2006) The Cfr rRNA methyltransferase confers resistance to phenicols, lincosamides, oxazolidinones, pleuromutilins, and streptogramin A antibiotics. *Antimicrob Agents Chemother* 50:2500–2505.
15. Kehrenberg C, Schwarz S, Jacobsen L, Hansen LH, Vester B (2005) A new mechanism for chloramphenicol, florfenicol and clindamycin resistance: Methylation of 23S ribosomal RNA at A2503. *Mol Microbiol* 57:1064–1073.
16. Toh SM, *et al.* (2007) Acquisition of a natural resistance gene renders a clinical strain of methicillin-resistant *Staphylococcus aureus* resistant to the synthetic antibiotic linezolid. *Mol Microbiol* 64:1506–1514.
17. Prystowsky J, *et al.* (2001) Resistance to linezolid: Characterization of mutations in rRNA and comparison of their occurrences in vancomycin-resistant enterococci. *Antimicrob Agents Chemother* 45(7):2154–2156.
18. Lobritz M, *et al.* (2003) Recombination proficiency influences frequency and locus of mutational resistance to linezolid in *Enterococcus faecalis*. *Antimicrob Agents Chemother* 47(10):3318–3320.
19. Auckland C, *et al.* (2002) Linezolid-resistant enterococci: report of the first isolates in the United Kingdom. *J Antimicrob Chemother* 50(5):743–746.
20. Wilson P, *et al.* (2003) Linezolid resistance in clinical isolates of *Staphylococcus aureus*. *J Antimicrob Chemother* 51(1):186–188.
21. Rahim S, *et al.* (2003) Linezolid-resistant, vancomycin-resistant *Enterococcus faecium* infection in patients without prior exposure to linezolid. *Clin Infect Dis* 36(11):E146–E148.
22. Pillai SK, *et al.* (2002) Linezolid resistance in *Staphylococcus aureus*: characterization and stability of resistant phenotype. *J Infect Dis* 186(11):1603–1607.
23. Tsiodras S, *et al.* (2001) Linezolid resistance in a clinical isolate of *Staphylococcus aureus*. *Lancet* 358(9277):207–208.
24. Herrero IA, *et al.* (2002). Nosocomial spread of linezolid-resistant, ancomycin-resistant *Enterococcus faecium*. *N Engl J Med* 346(11): 867–869.

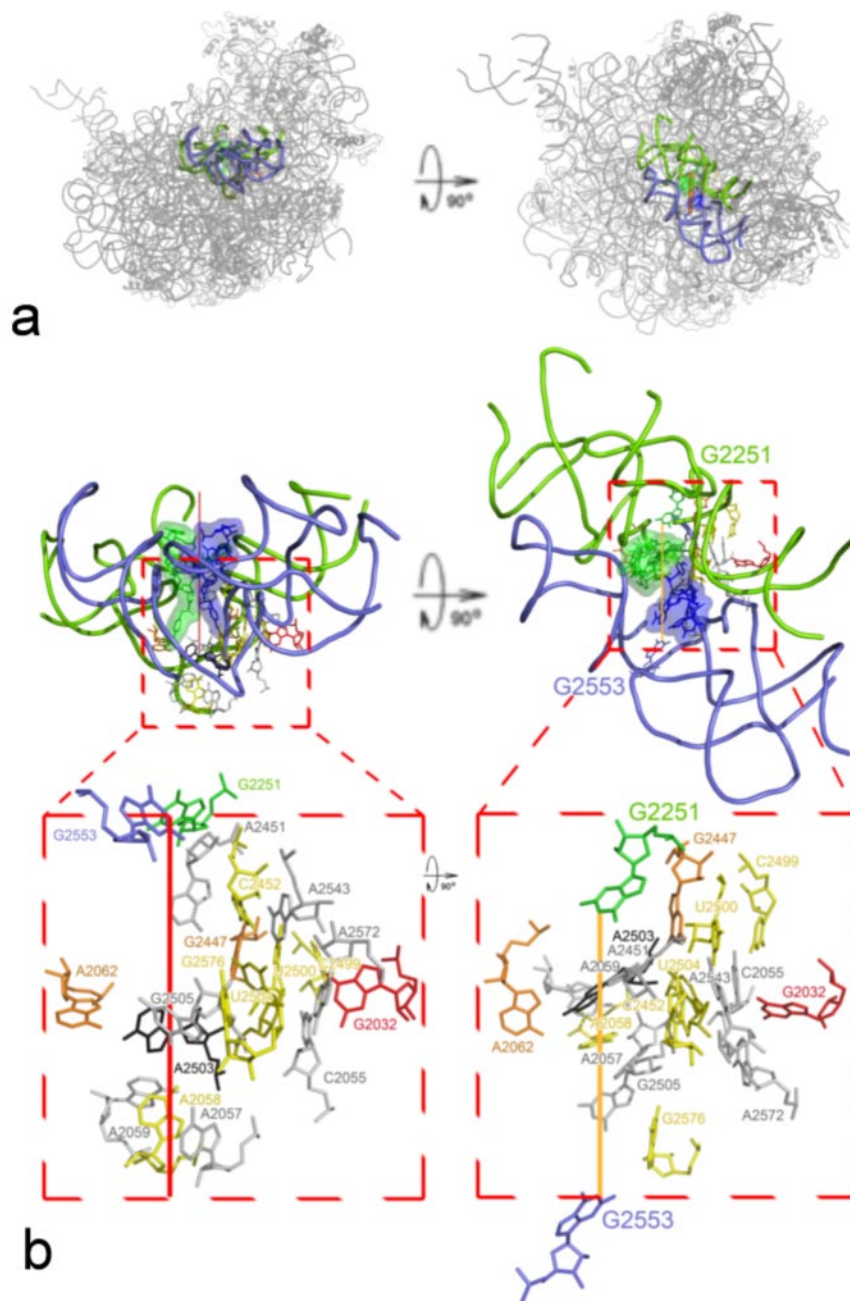

**Fig. S1.** The centrality of the symmetrical region and the 2 perpendicular axes that define the planes confining the PTC regions that participate in antibiotic resistance. In all: images were captured perpendicular to the 2-fold symmetry axes (*Right*) and to the axes defined by the line connecting G2553 to G2251 (*Left*). The rRNA backbone is shown in gray, except for the symmetrical region, where the subregion containing the A loop (called A region), is colored blue and that containing the P-loop (the P-region) is shown in green. The imaginary 2-fold rotation axis is shown in red. The color code for substrate mimics and nucleotides involved in resistance is as in Fig. 2. (a) Two views of the large ribosomal subunit showing the centrality of the internal 2-fold symmetry region. The left side shows the large subunit as seen from its interface surface, and the right side is a view taken into the PTC. (b) The symmetrical region with the two imaginary axes relevant to cross-resistance. (*Left*) The 2-fold symmetry axis (in red). (*Right*) The line connecting G2553 to G2251, which divides the front and back walls of the PTC (in orange). The 2 pseudo-symmetry regions of the PTC, including the A loop and the P loop, are pale blue and green, respectively. Zooms into these views, in which the nucleotides involved in resistance or reduced susceptibility are depicted, are shown in *Lower*.



**Table S1. Nucleotides mediating PTC antibiotic resistance**

| Nucleotide | Appeared clinically (Y/N) | Antibiotic (family)                                                                                    | Bacterial strain                                | Ref.   |
|------------|---------------------------|--------------------------------------------------------------------------------------------------------|-------------------------------------------------|--------|
| 2032       | N                         | Chloramphenicol (phenicol)                                                                             | <i>E. coli</i>                                  | 1      |
|            |                           |                                                                                                        | <i>B. hyodysenteriae</i>                        | 2      |
|            |                           | Clindamycin (lincosamide)                                                                              | <i>E. coli</i>                                  | 1      |
|            |                           | Linezolid (oxazolidinone)                                                                              | <i>E. coli</i>                                  | 3      |
| 2055       | N                         | Tiamulin (pleuromutilin)                                                                               | <i>B. hyodysenteriae</i>                        | 2      |
|            |                           |                                                                                                        | <i>B. pilosicoli</i>                            | 2      |
| 2057       | N                         | Chloramphenicol (phenicol)                                                                             | <i>E. coli</i>                                  | 1, 4   |
| 2058       | Y                         | Chloramphenicol (phenicol)                                                                             | <i>E. coli</i>                                  | 1      |
|            |                           | Clindamycin (lincosamide)                                                                              | <i>E. coli</i>                                  | 1      |
| 2059       | N                         | Virginiamycin M1 and Pristinamycin II (streptogramins A)                                               | <i>H. halobium</i>                              | 5      |
| 2062       | Y                         | Chloramphenicol (phenicol)                                                                             | <i>H. halobium</i>                              | 6      |
|            |                           | Linezolid (oxazolidinone)                                                                              | <i>H. halobium</i>                              | 7      |
|            |                           | Pristinamycin II (streptogramins A)                                                                    | <i>S. pneumoniae</i>                            | 8      |
|            |                           | Pristinamycin I with pristinamycin II or dalfopristin with quinupristin (streptogramins A and B)       | <i>S. pneumoniae</i>                            | 8      |
| 2447       | N                         | Linezolid (oxazolidinone)                                                                              | <i>E. coli</i>                                  | 3      |
|            |                           |                                                                                                        | <i>M. smegmatis</i>                             | 9      |
|            |                           | Tiamulin (pleuromutilin)                                                                               | <i>B. hyodysenteriae</i>                        | 2      |
|            |                           |                                                                                                        | <i>E. coli</i>                                  | 10     |
|            |                           |                                                                                                        | <i>E. coli</i> and <i>B. stearothersophilus</i> | 11     |
| 2451       | N                         | Chloramphenicol (phenicol)                                                                             | <i>E. coli</i> and <i>B. stearothersophilus</i> | 11     |
| 2452       | N                         | Chloramphenicol (phenicol)                                                                             | <i>H. halobium</i>                              | 6      |
|            |                           | Linezolid (oxazolidinone)                                                                              | <i>H. halobium</i>                              | 7      |
| 2453       | N                         | Linezolid (oxazolidinone)                                                                              | <i>H. halobium</i>                              | 7      |
| 2499       | N                         | Linezolid (oxazolidinone)                                                                              | <i>H. halobium</i>                              | 7      |
| 2500       | Y                         | Tiamulin (pleuromutilin)                                                                               | <i>B. hyodysenteriae</i>                        | 2      |
|            |                           | Linezolid (oxazolidinone)                                                                              | <i>S. aureus</i> (MRSA)                         | 12     |
|            |                           |                                                                                                        | <i>H. halobium</i>                              | 7      |
|            |                           |                                                                                                        | <i>E. coli</i>                                  | 10     |
| 2503       | Y                         | Tiamulin (pleuromutilin)                                                                               | <i>E. coli</i>                                  | 10     |
|            |                           | Chloramphenicol and florfenicol (phenicols)                                                            | <i>E. coli</i>                                  | 13     |
|            |                           |                                                                                                        | <i>S. aureus</i> and <i>E. coli</i>             | 14, 15 |
|            |                           |                                                                                                        | <i>S. aureus</i>                                | 16     |
|            |                           | Clindamycin (lincosamide)                                                                              | <i>S. aureus</i> and <i>E. coli</i>             | 14, 15 |
|            |                           |                                                                                                        | <i>S. aureus</i>                                | 16     |
|            |                           | Linezolid (oxazolidinones)                                                                             | <i>S. aureus</i> and <i>E. coli</i>             | 14, 15 |
|            |                           |                                                                                                        | <i>S. aureus</i>                                | 16     |
|            |                           | Tiamulin and Valnemulin (pleuromutilins)                                                               | <i>S. aureus</i> and <i>E. coli</i>             | 14, 15 |
|            |                           | virginiamycin M <sub>1</sub> (streptogramins A) and dalfopristin/quinupristin (streptogramins A and B) | <i>S. aureus</i> and <i>E. coli</i>             | 14, 15 |
| 2504       | N                         | Linezolid (oxazolidinone)                                                                              | <i>H. halobium</i>                              | 5      |
|            |                           |                                                                                                        | <i>H. halobium</i>                              | 7      |
|            |                           | Tiamulin (pleuromutilin)                                                                               | <i>Brachyspira pilosicoli</i>                   | 2      |
| 2505       | N                         |                                                                                                        | <i>B. hyodysenteriae</i>                        | 2      |
|            |                           | Linezolid (oxazolidinone)                                                                              | Enterococcus                                    | 17     |
| 2572       | N                         |                                                                                                        | <i>E. faecalis</i>                              | 18     |
|            |                           | Tiamulin (pleuromutilin)                                                                               | <i>B. hyodysenteriae</i>                        | 2      |
| 2576       | Y                         | Linezolid (oxazolidinone)                                                                              | Enterococcus                                    | 17     |
|            |                           |                                                                                                        | Enterococcus                                    | 19     |
|            |                           |                                                                                                        | <i>S. aureus</i>                                | 20     |
|            |                           |                                                                                                        | <i>E. faecium</i>                               | 21     |
|            |                           |                                                                                                        | <i>S. aureus</i>                                | 22     |
|            |                           |                                                                                                        | <i>S. aureus</i>                                | 23     |
|            |                           |                                                                                                        | <i>E. faecium</i>                               | 24     |
|            |                           | Tiamulin (pleuromutilin)                                                                               | <i>S. aureus</i>                                | 10     |
